# Supplementary material
Source: PubMed Central journal article supplement (PMC1693719)

**A**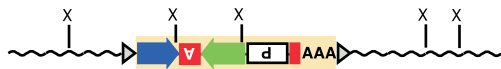

1. Digest mouse genomic DNA with enzyme MspI (X)

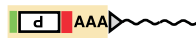

2. Circularize by intramolecular ligation

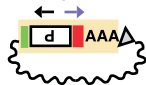

3. Single round PCR of 35 cycles

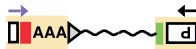

4. TA clone, sequence, and Blast against mouse genome database

**B**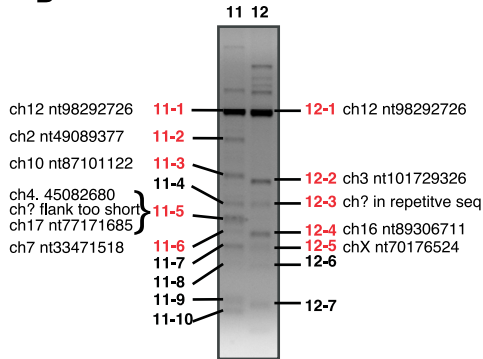**C**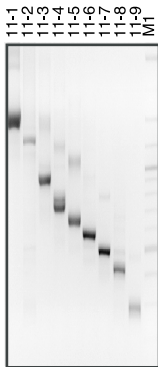

Supplement: pnas_0605300103_3.pdf [file pnas_0605300103_3.pdf]
