# Supplementary material
Source: PubMed Central journal article supplement (PMC1693719)
Supplement: pnas_0605300103_6.pdf [file pnas_0605300103_6.pdf]

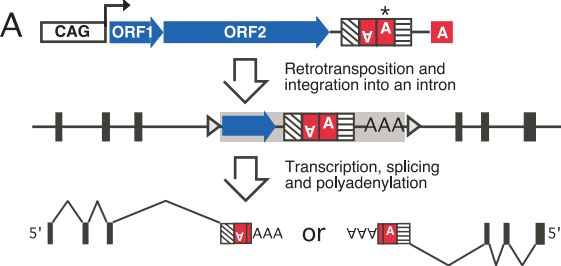

**B**

| Clone ID | Gene/<br>transcript | Descriptive gene name                                   | Total # of<br>introns | Insertion<br>position | Intron size |
|----------|---------------------|---------------------------------------------------------|-----------------------|-----------------------|-------------|
| L1-13    | RP11-<br>202K23.1   | N/A                                                     | 5                     | intron 5              | 110,272     |
| L1-14    | POLR2B              | RNA polymerase II subunit 2                             | 24                    | intron 1              | 7,349       |
| L1-15    | SFR17               | Serine-arginine-rich splicing<br>regulatory protein 130 | 9                     | 3'UTR                 | N/A         |
| L1-16    | ARF1                | ADP-ribosylation factor 1                               | 4                     | intron 1              | 14,312      |
| L1-17    | Q9NV52              | lamina-associated polypeptide 1B                        | 7                     | intron 3              | 10,756      |
