# Supplementary material
Source: PubMed Central journal article supplement (PMC1693719)

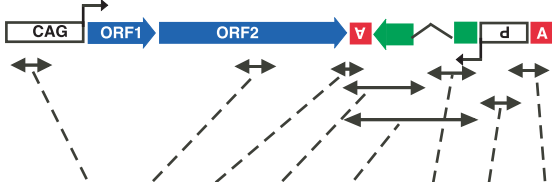

| ID#  | 5'end | ORF2 | TKpA | 5'jxn | intron | 3'jxn | 3'end | 3'pA |
|------|-------|------|------|-------|--------|-------|-------|------|
| F209 | -     | +    | +    | -     | +S     | -     | -     | -    |
| F210 | +     | +    | +    | +     | +S, +U | +     | +     | +    |
| F211 | +     | +    | +    | +     | +S, +U | +     | +     | +    |
| F234 | -     | +    | +    | -     | +S     | -     | +     | -    |
| F235 | -     | -    | +    | -     | +S     | -     | +     | -    |
| F237 | -     | +    | +    | -     | +S     | -     | +     | -    |

Supplement: pnas_0605300103_1.pdf [file pnas_0605300103_1.pdf]

Donor |

F209  
F210  
F211  
F234  
F235  
F237  
NEG  
POS

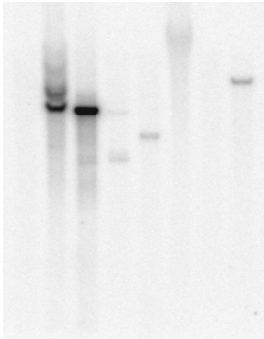

Supplement: pnas_0605300103_2.pdf [file pnas_0605300103_2.pdf]

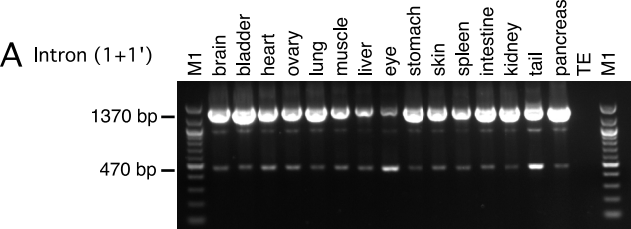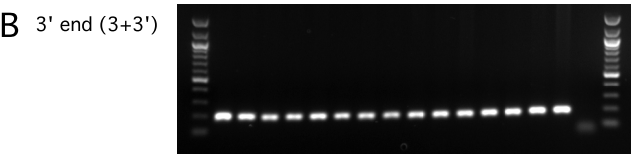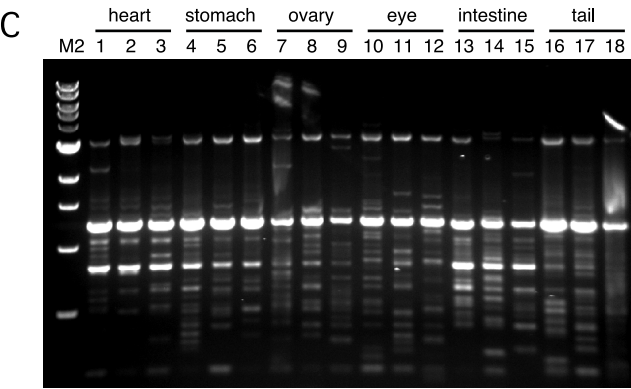

Supplement: pnas_0605300103_4.pdf [file pnas_0605300103_4.pdf]

**A** Intron (1+1')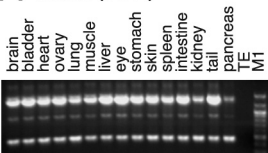

## N2 progeny from F1 mouse B131

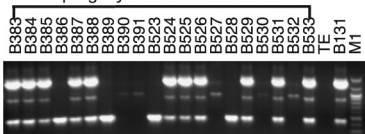**B** 3' jxn (2+1')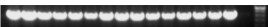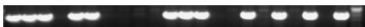**C** 3' end (3+3')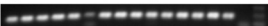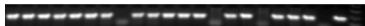**D** Hprt control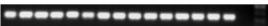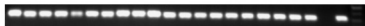

Supplement: pnas_0605300103_5.pdf [file pnas_0605300103_5.pdf]
